# Supplementary material for: Suppression of Oncolytic Adenovirus-Mediated Hepatotoxicity by Liver-Specific Inhibition of NF-κB
Source: PubMed Central journal article supplement (PMC5704103; doi:10.1016/j.omto.2017.10.003), 2017-10-26
Supplement: mmc1.pdf [file mmc1.pdf]

**OMTO, Volume 7**

**Supplemental Information**

**Suppression of Oncolytic Adenovirus-Mediated  
Hepatotoxicity by Liver-Specific Inhibition  
of NF- $\kappa$ B**

**Mitsuhiro Machitani, Fuminori Sakurai, Keisaku Wakabayashi, Kosuke Nakatani, Masashi Tachibana, Nobuyuki Kato, Toshiyoshi Fujiwara, and Hiroyuki Mizuguchi**

## Supplemental Figures

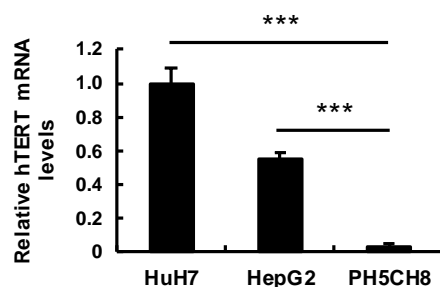

**Suppl. Fig. S1. Expression levels of human telomerase reverse transcriptase (hTERT) in PH5CH8 cells.** hTERT mRNA levels were determined by qRT-PCR analysis. The ratios of hTERT to GAPDH mRNA levels are shown. The data of HuH7 cells was normalized to 1. Data are the means $\pm$ SD (n=4). \*\*\*p<0.001.

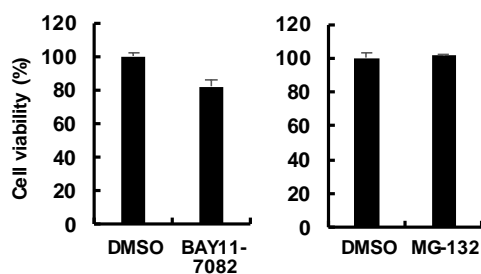

**Suppl. Fig. S2. Viability of PH5CH8 cells after treatment with NF- $\kappa$ B inhibitors.** PH5CH8 cells were treated with BAY11-7082 and MG-132 at 5  $\mu$ M and 2.5  $\mu$ M, respectively. After 24-hr incubation, cell viability was determined by alamarBlue<sup>®</sup> assay. Data are the means $\pm$ SD (n=4).

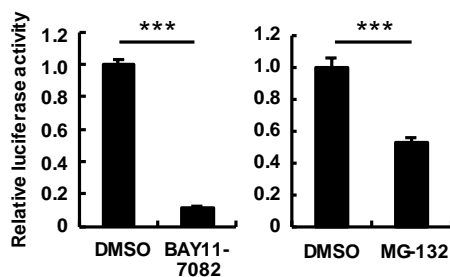

**Suppl. Fig. S3. NF- $\kappa$ B activity in PH5CH8 cells after treatment with NF- $\kappa$ B inhibitors.** PH5CH8 cells were pretreated with BAY11-7082 and MG-132 at 5  $\mu$ M and 2.5  $\mu$ M, respectively for 1 hr, followed by transfection with pNF- $\kappa$ B-Luc. After 24-hr incubation, luciferase activity was determined. The data show FLuc activity normalized by RLuc activity in the cells. Data are the means $\pm$ SD (n=4).

### Suppl. Table S1

#### The primers used in this study

| No | name     | sequence                        |
|----|----------|---------------------------------|
| 1  | DNikBa-F | tgtctagacagccatgtttcagccagc     |
| 2  | DNikBa-R | aagcggccgcttataatgtcagacgctggcc |
| 3  | E1A-F    | tccggtccttctaacacacctc          |
| 4  | E1A-R    | acggcaactggtttaatggg            |
| 5  | E2-F     | cactacggtgcgagtgcaa             |
| 6  | E2-R     | ggtagctgccttcccaaaaag           |
| 7  | E4-F     | gggatcgtctacctcctttga           |
| 8  | E4-R     | gggcagcagcggatgat               |
| 9  | hGAPDH-F | ggtggtctcctctgacttcaaca         |
| 10 | hGAPDH-R | gtggtcgttgagggaatg              |
| 11 | mGAPDH-F | caatgtgtccgtcgtgatct            |
| 12 | mGAPDH-R | gtcctcagtgtagcccaagatg          |
